# Supplementary material for: How Will Climate-Induced Migration Affect the Future Distribution of Population in the US?
Source: Research Square preprint supplement (doi:10.21203/rs.3.rs-1813012/v1), 2023-09-22
Supplement: Supplementary file 1 [file 56192c95ce6b7039ee21b0a6.pdf]

# Supporting Information for: Carbone et al., How Will Climate-Induced Migration Affect the Future Distribution of Population in the US?

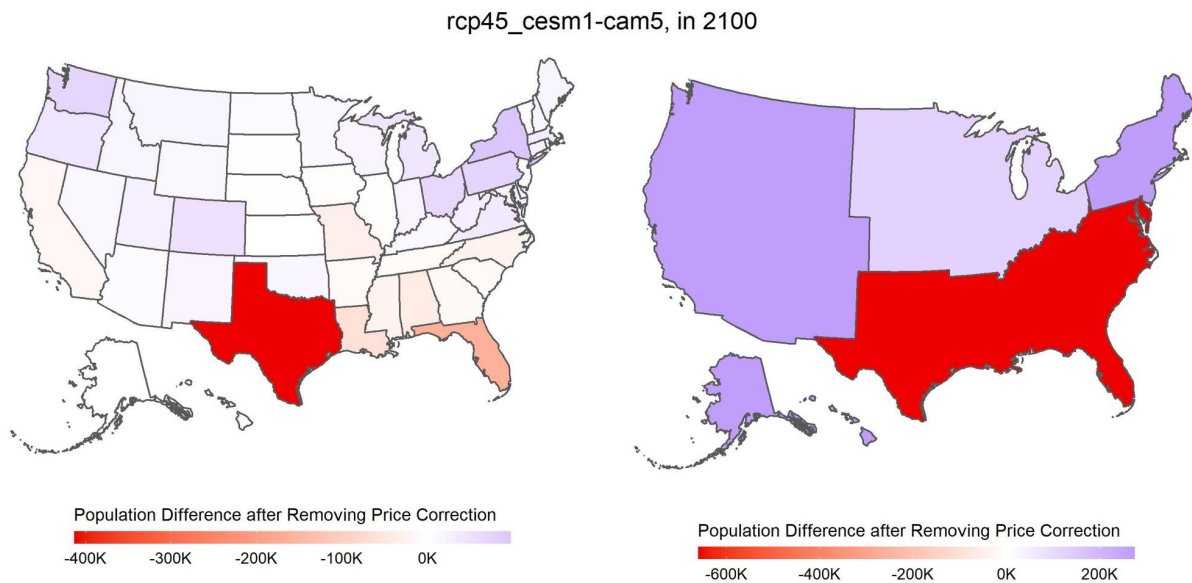

Figure S1: Difference in end-of-century population when economic feedbacks are omitted. SSP2, RCP4.5, CESM-CAM5.

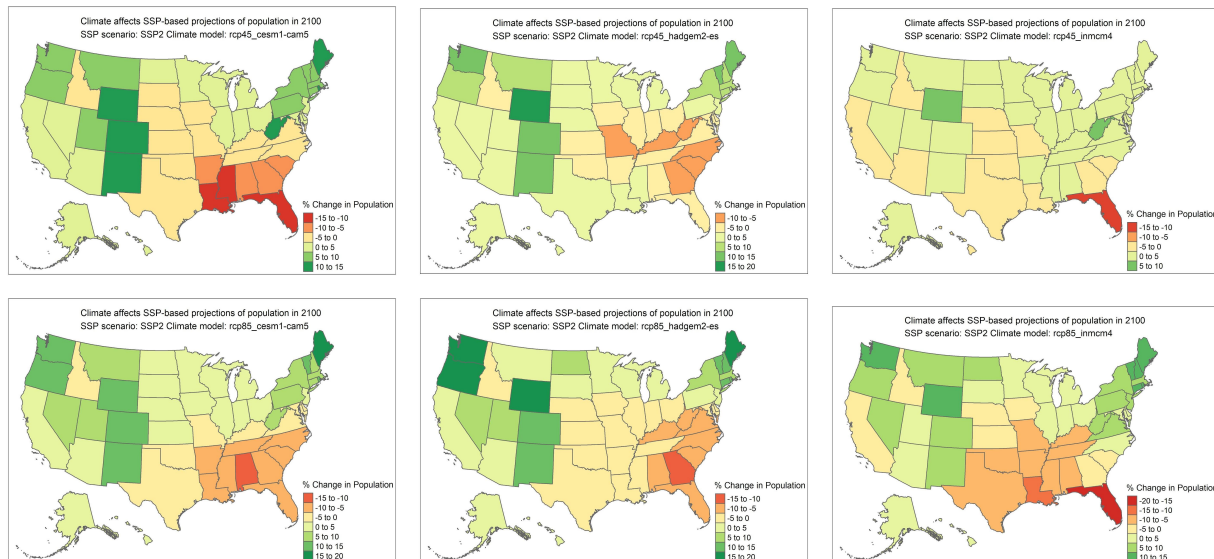

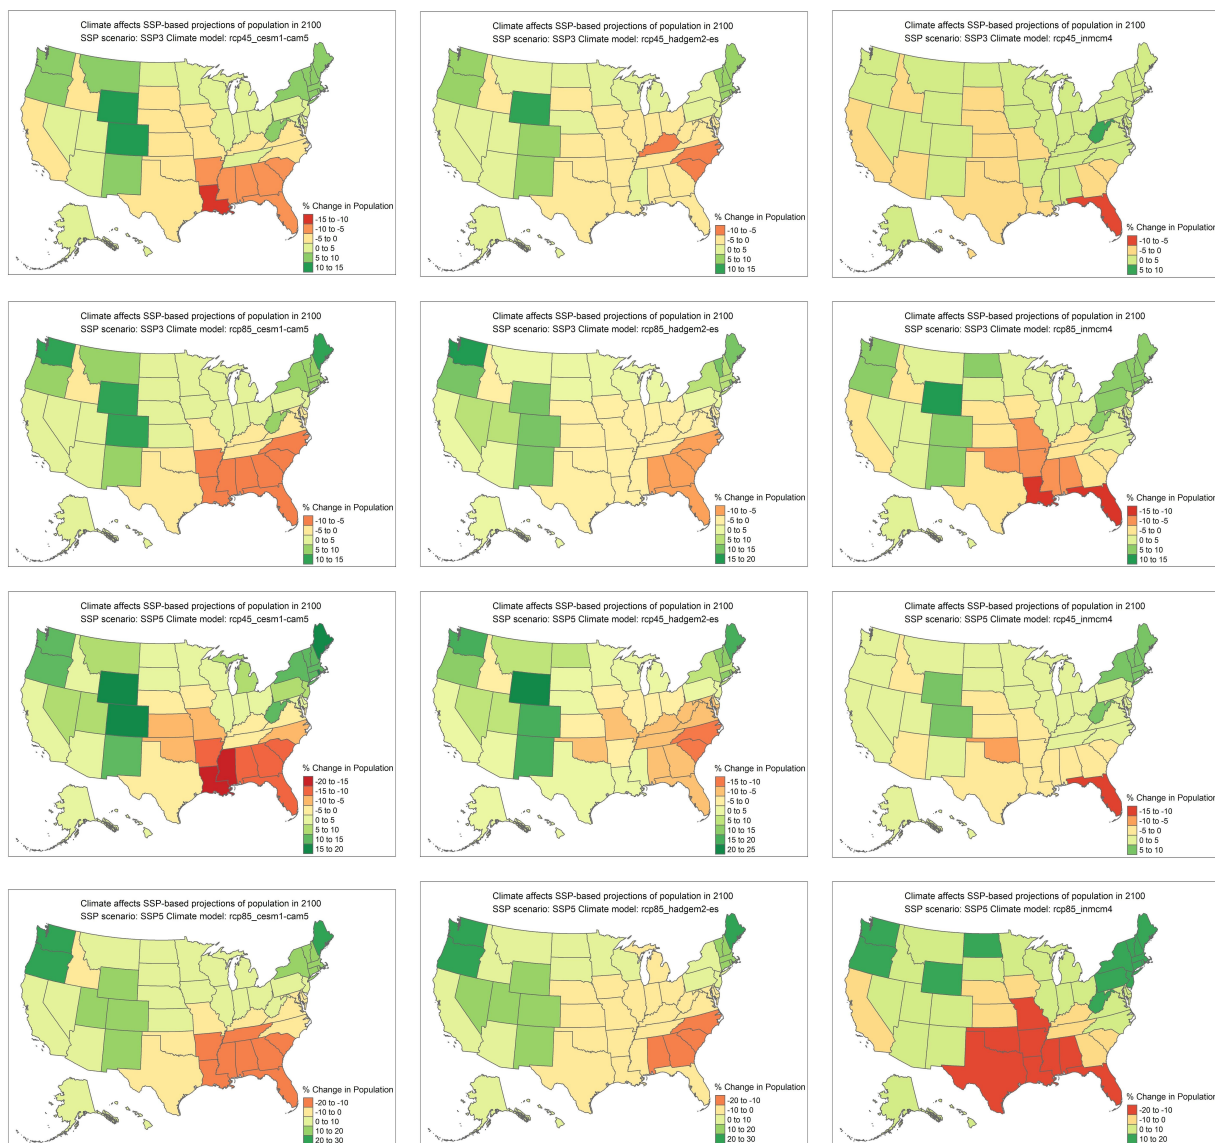

Figure S2: End-of-century changes in population. All scenarios. RCP and SSP vary by row. CMIP5 ensemble member varies by column. Population change expressed as a percent difference from projected population without the influence of climate by state.

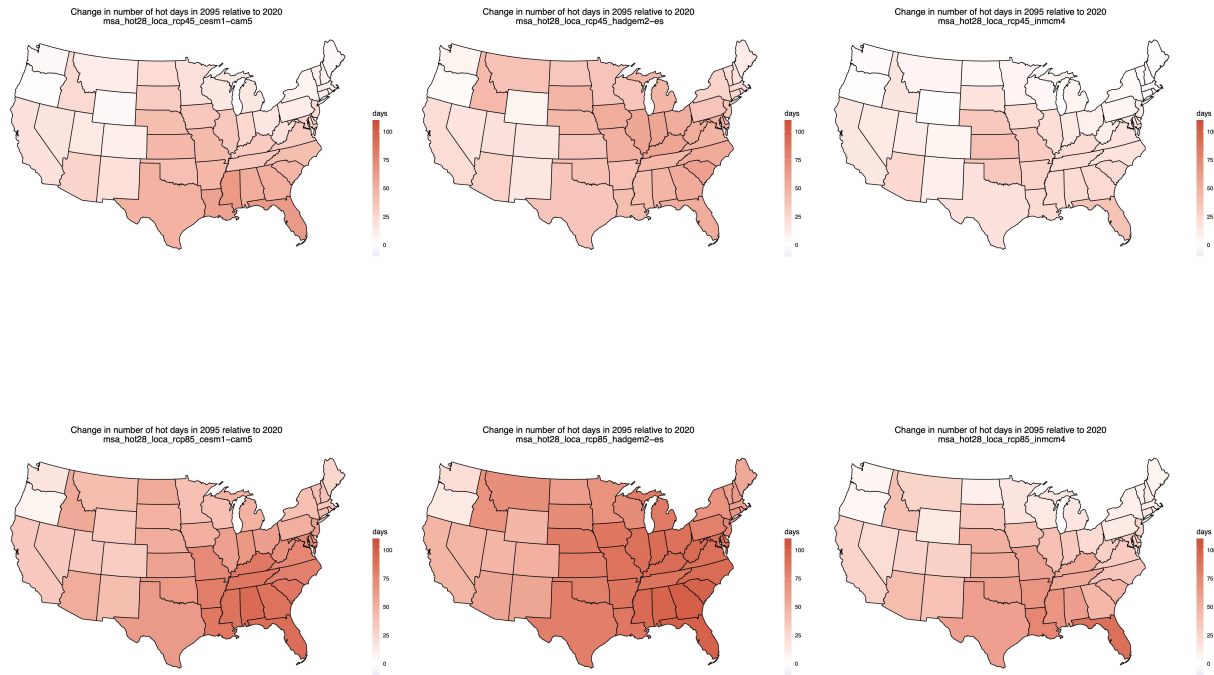

Figure S3: End-of-century changes in temperature. All scenarios. RCP varies by row and CMIP5 ensemble member varies by column. Change in the number of days annually in which average temperature exceeds 28°C in 2095.
